# Supplementary material for: Measurement of arsenic species in environmental, biological fluids and food samples by HPLC-ICPMS and HPLC-HG-AFS
Source: Royal Society of Chemistry journal article supplement (doi:10.1039/c5ja00155b), 2015-01-01
Supplement: c5ja00155b1.pdf [file c5ja00155b1.pdf]

Table S1: Typical applications using HPLC-ICPMS and HPLC-HG-AFS

| Application                               | HPLC-ICPMS or HPLC-HG-ICPMS  | HPLC-HG-AFS            |
|-------------------------------------------|------------------------------|------------------------|
| <b>Biological</b>                         |                              |                        |
| Urine                                     | [1-33]                       | [2, 3, 13, 14, 34, 35] |
| Rat urine                                 | [36]                         |                        |
| Sheep urine                               | [37, 38]                     |                        |
| Blood-serum                               | [10, 12, 14, 17, 32, 39, 40] | [14, 41]               |
| Saliva                                    | [42]                         |                        |
| Hair                                      | [10, 43]                     |                        |
| Gut microflora                            | [44, 45]                     |                        |
| Skin                                      | [46]                         |                        |
| Finger nails                              | [10]                         |                        |
| Liver cytosol                             | [47]                         |                        |
| <b>Terrestrial</b>                        |                              |                        |
| Atmospheric particles                     |                              | [48-52]                |
| Water                                     | [2, 9, 28, 53-74]            | [2, 34, 53, 75-78]     |
| Leachates                                 | [79, 80]                     |                        |
| Soil/sediments                            | [9, 81-90]                   | [91-93]                |
| Grass                                     | [94]                         |                        |
| Coal                                      |                              |                        |
| Fungus                                    | [95, 96]                     |                        |
| Plants                                    | [87, 94, 97-104]             | [93, 105]              |
| Ferns                                     | [86, 106]                    |                        |
| Indian Cress                              | [99]                         |                        |
| Rice                                      | [56, 81, 107-124]            |                        |
| Wheat                                     |                              | [125]                  |
| Cereals                                   | [126]                        |                        |
| Beverages (soft drink, beer, juice, wine) | [8, 127-129]                 | [130, 131]             |
| Dietary supplements                       | [132]                        |                        |
| Apples                                    | [114]                        |                        |
| Mushrooms                                 | [133, 134]                   |                        |
| Tomatoes                                  |                              |                        |
| Castor beans                              | [135]                        |                        |
| Radishes                                  | [136]                        |                        |
| Spinach                                   | [114]                        |                        |

|                  |                                                                                  |                 |
|------------------|----------------------------------------------------------------------------------|-----------------|
| Mung beans       | [137]                                                                            |                 |
| Pepper           | [138]                                                                            |                 |
| White mustard    | [139]                                                                            |                 |
| Carrots          | [140, 141]                                                                       |                 |
| Herbal medicines | [142]                                                                            |                 |
| Wheat            | [107, 143, 144]                                                                  |                 |
| Chicken          | [81]                                                                             | [145]           |
| Baby foods       |                                                                                  | [146]           |
| Birds eggs       | [53]                                                                             | [53]            |
| Earthworms       | [147-149]                                                                        |                 |
| Invertebrates    | [101]                                                                            |                 |
| Rodents          | [102]                                                                            |                 |
| Plankton         | [150, 151]                                                                       |                 |
| Fish             | [109, 152]                                                                       |                 |
| algae            | [109]                                                                            |                 |
| Sponge           | [109]                                                                            |                 |
| Mollusca         | [109, 153]                                                                       |                 |
| Frog             |                                                                                  |                 |
| <b>Marine</b>    |                                                                                  |                 |
| Water            | [53, 154-156]                                                                    | [53]            |
| Sediment         | [53, 77, 154, 157-160]                                                           |                 |
| Phytoplankton    | [74, 159, 161-164]                                                               |                 |
| Angiosperms      | [158-160, 165-168]                                                               |                 |
| Seaweeds         | [74, 95, 166, 169-187]                                                           | [188]           |
| Se anemone       | [189]                                                                            |                 |
| Mollusca         | [53, 60, 74, 159, 160, 165, 177, 178, 182, 190-196]                              | [153, 197-199]  |
| Crustaceans      | [153, 157-160, 165, 166, 170, 173, 182, 192, 198, 200]                           |                 |
| Fish             | [60, 61, 74, 81, 84, 107, 157, 159, 160, 165, 178, 182, 192, 193, 196, 201, 202] | [153, 197, 198] |
| Fish sauce       | [203]                                                                            |                 |
| Polychaetes      | [159, 160, 166, 204, 205]                                                        |                 |
| Pinnipeds        | [206]                                                                            |                 |
| Sea birds        | [206]                                                                            |                 |
| Sea turtles      | [206]                                                                            |                 |

## References

1. Ellis, J., et al., *Complementary molecular and elemental detection of speciated thioarsenicals using ESI-MS in combination with a xenon-based collision-cell ICP-MS with application to fortified NIST freeze-dried urine*. Analytical and bioanalytical chemistry, 2008. **390**(7): p. 1731-1737.
2. Moldovan, M., et al., *Arsenic Speciation in Water and Human Urine by HPLC-ICP-MS and HPLC-MO-HG-AAS*. Microchemical Journal, 1998. **59**(1): p. 89-99.
3. Le, X. and M. Ma, *Speciation of arsenic compounds by using ion-pair chromatography with atomic spectrometry and mass spectrometry detection*. Journal of Chromatography A, 1997. **764**(1): p. 55-64.
4. Le, X., W. Cullen, and K. Reimer, *Speciation of arsenic compounds by HPLC with hydride generation atomic absorption spectrometry and inductively coupled plasma mass spectrometry detection*. Talanta, 1994. **41**(4): p. 495-502.
5. Larsen, E.H., G. Pritzl, and S.H. Hansen, *Speciation of eight arsenic compounds in human urine by high-performance liquid chromatography with inductively coupled plasma mass spectrometric detection using antimonate for internal chromatographic standardization*. Journal of Analytical Atomic Spectrometry, 1993. **8**(4): p. 557-563.
6. Heitkemper, D., et al., *Speciation of arsenic in urine using high-performance liquid chromatography with inductively coupled plasma mass spectrometric detection*. J. Anal. At. Spectrom., 1989. **4**(3): p. 279-284.
7. Ritsema, R., et al., *Speciation of arsenic compounds in urine by LC-ICP MS*. Applied Organometallic Chemistry, 1998. **12**: p. 591-599.
8. Sheppard, B.S., et al., *Arsenic speciation by ion chromatography with inductively coupled plasma mass spectrometric detection*. Analyst, 1992. **117**(6): p. 971-975.
9. Yehl, P.M. and J.F. Tyson, *Towards speciation of arsenic in a standard reference river sediment by high-performance ion chromatography coupled with plasma source mass spectrometry*. Analytical Communications, 1997. **34**(2): p. 49-51.
10. Mandal, B., et al., *Speciation of arsenic in biological samples*. Toxicology and applied pharmacology, 2004. **198**(3): p. 307-318.
11. Raml, R., et al., *Novel Thioarsenic Metabolites in Human Urine after Ingestion of an Arsenosugar, 2',3'-Dihydroxypropyl 5-Deoxy-5-dimethylarsinoyl- $\beta$ -D-ribose*. Chemical Research in Toxicology, 2005. **18**(9): p. 1444-1450.
12. Raml, R., et al., *Individual variability in the human metabolism of an arsenic-containing carbohydrate, 2', 3'-dihydroxypropyl 5-deoxy-5-dimethylarsinoyl- $\beta$ -D-ribose, a naturally occurring arsenical in seafood*. Chemical Research in Toxicology, 2009. **22**(9): p. 1534-1540.
13. Lindberg, A.-L., et al., *Evaluation of the three most commonly used analytical methods for determination of inorganic arsenic and its metabolites in urine*. Toxicology letters, 2007. **168**(3): p. 310-318.
14. Slejkovec, Z., et al., *Analytical artefacts in the speciation of arsenic in clinical samples*. Analytica chimica acta, 2008. **607**(1): p. 83-91.
15. Morton, J. and E. Leese, *Arsenic speciation in clinical samples: urine analysis using fast micro-liquid chromatography ICP-MS*. Analytical and bioanalytical chemistry, 2011. **399**(5): p. 1781-1788.

16. Hansen, H., et al., *Sulfur-containing arsenical mistaken for dimethylarsinous acid [DMA(III)] and identified as a natural metabolite in urine: major implications for studies on arsenic metabolism and toxicity*. Chemical research in toxicology, 2004. **17**(8): p. 1086-1091.
17. Contreras-Acuña, M., et al., *Arsenic metabolites in human serum and urine after seafood (Anemonia sulcata) consumption and bioaccessibility assessment using liquid chromatography coupled to inorganic and organic mass spectrometry*. Microchemical Journal, 2014. **112**: p. 56-64.
18. Sloth, J., E. Larsen, and K. Julshamn, *Selective arsenic speciation analysis of human urine reference materials using gradient elution ion-exchange HPLC-ICP-MS*. Journal of Analytical Atomic Spectrometry, 2004. **19**: p. 973-978.
19. Samanta, G., et al., *High performance liquid chromatography inductively coupled plasma mass spectrometry for speciation of arsenic compounds in urine*. Microchemical Journal, 2000. **65**(2): p. 113-127.
20. Heitland, P. and H.D. Köster, *Comparison of different medical cases in urinary arsenic speciation by fast HPLC-ICP-MS*. International journal of hygiene and environmental health, 2009. **212**(4): p. 432-438.
21. Rabieh, S., A.V. Hirner, and J. Matschullat, *Determination of arsenic species in human urine using high performance liquid chromatography (HPLC) coupled with inductively coupled plasma mass spectrometry (ICP-MS)*. Journal of Analytical Atomic Spectrometry, 2008. **23**(4): p. 544-549.
22. Reuter, W., et al., *Speciation of five arsenic compounds in urine by HPLC/ICP-MS*. Perkin Elmer Application Notes 2003. 2003.
23. Xie, R., et al., *Arsenic speciation analysis of human urine using ion exchange chromatography coupled to inductively coupled plasma mass spectrometry*. Analytica Chimica Acta, 2006. **578**(2): p. 186-194.
24. Milstein, L., et al., *Development and application of a robust speciation method for determination of six arsenic compounds present in human urine*. Environmental health perspectives, 2003. **111**(3): p. 293-296.
25. Verdon, C.P., et al., *Determination of seven arsenic compounds in urine by HPLC-ICP-DRC-MS: a CDC population biomonitoring method*. Analytical and Bioanalytical Chemistry, 2009. **393**(3): p. 939-947.
26. Nakazato, T., et al., *Ion-exclusion chromatography combined with ICP-MS and hydride generation-ICP-MS for the determination of arsenic species in biological matrices*. J. Anal. Atom. Spectrom., 2000. **15**: p. 1546-1552.
27. Sloth, J.J., E.H. Larsen, and K. Julshamn, *Determination of arganoarsenic species in marine samples using gradient elution cation exchange HPLC-ICP-MS*. J. Anal. Atom. Spectrom., 2003. **18**: p. 452 - 459.
28. James, W., et al., *Arsenic speciation: HPLC followed by ICP-MS or INAA*. Journal of Radioanalytical and Nuclear Chemistry, 2008. **278**(2): p. 267-270.
29. Wrobel, K., et al., *Determination of As(III), As(V), monomethylarsonic acid, dimethylarsinic acid and arsenobetaine by HPLC-ICP-MS: analysis of reference materials, fish tissues and urine*. Talanta, 2002. **58**(5): p. 899-907.
30. Mandal, B.K., Y. Ogra, and K.T. Suzuki, *Identification of dimethylarsinous and monomethylarsonous acids in human urine of the arsenic-affected areas in West Bengal, India*. Chem. Res. Toxicol., 2001. **14**: p. 371-378.
31. Raml, R., W. Goessler, and K. Francesconi, *Improved chromatographic separation of thio-arsenic compounds by reversed-phase high performance liquid chromatography-inductively coupled plasma mass spectrometry*. Journal of chromatography. A, 2006. **1128**(1-2): p. 164-170.
32. Norin, H. and M. Vahter, *A rapid method for the selective analysis of total urinary metabolites of inorganic arsenic*. Scandinavian journal of work, environment & health, 1981: p. 38-44.
33. Francesconi, K., et al., *Arsenic metabolites in human urine after ingestion of an arsenosugar*. Clinical chemistry, 2002. **48**(1): p. 92-101.

34. Le, X.C. and M. Ma, *Short-column liquid chromatography with hydride generation atomic fluorescence detection for the speciation of arsenic*. Analytical Chemistry, 1998. **70**(9): p. 1926-1933.
35. Wei, C. and J. Liu, *A new hydride generation system applied in determination of arsenic species with ion chromatography-hydride generation-atomic fluorescence spectrometry (IC-HG-AFS)*. Talanta, 2007. **73**(3): p. 540-545.
36. Inoue, Y., et al., *Determination of arsenic compounds using inductively coupled plasma mass spectrometry with ion chromatography*. Journal of Chromatography A, 1994. **675**(1): p. 149-154.
37. Hansen, H.R., et al., *2-Dimethylarsinothioyl acetic acid Identified in a biological sample: The first occurrence of a mammalian arsinothioyl metabolite*. Angew. Chem. Int. Ed., 2004. **43**: p. 337-340.
38. Martin, S., J. , et al., *Arsenosugar Metabolism Not Unique to the Sheep of North Ronaldsay*. Environmental Chemistry, 2005. **2**: p. 190-197.
39. Shibata, Y., J. Yoshinaga, and M. Morita, *Detection of arsenobetaine in human blood*. Applied Organometallic Chemistry, 1994. **8**: p. 249-251.
40. Ito, K., et al., *An interlaboratory study of arsenic speciation analysis of whole blood*. Journal of Analytical Atomic Spectrometry, 2011. **26**.
41. Zhang, Y., et al., *Liquid chromatography–hydride generation–atomic fluorescence spectrometry determination of arsenic species in dog plasma and its application to a pharmacokinetic study after oral administration of Realgar and* Niu Huang Jie Du Pian. Journal of Chromatography B, 2013. **917**: p. 93-99.
42. Yuan, C., et al., *Arsenic speciation analysis in human saliva*. Clinical Chemistry, 2008. **54**(1): p. 163-171.
43. Mandal, B.K., Y. Ogra, and K.T. Suzuki, *Speciation of arsenic in human nail and hair from arsenic-affected area by HPLC-inductively coupled argon plasma mass spectrometry*. Toxicology and Applied Pharmacology, 2003. **189**(2): p. 73-83.
44. Alava, P., et al., *HPLC-ICP-MS method development to monitor arsenic speciation changes by human gut microbiota*. Biomedical chromatography : BMC, 2012. **26**(4): p. 524-533.
45. Alava, P., et al., *Arsenic undergoes significant speciation changes upon incubation of contaminated rice with human colon micro biota*. Journal of hazardous materials, 2013. **262**: p. 1237-1244.
46. Ouypornkochagorn, S. and J. Feldmann, *Dermal uptake of arsenic through human skin depends strongly on its speciation*. Environmental science & technology, 2010. **44**(10): p. 3972-3978.
47. Hansen, H., M. Jaspars, and J. Feldmann, *Arsinothioyl-sugars produced by in vitro incubation of seaweed extract with liver cytosol analysed by HPLC coupled simultaneously to ES-MS and ICP-MS*. The Analyst, 2004. **129**(11): p. 1058-1064.
48. Yang, G., et al., *Levels and speciation of arsenic in the atmosphere in Beijing, China*. Chemosphere, 2012. **87**(8): p. 845-850.
49. Sanchez-Rodas, D., et al., *Health implications of the distribution of arsenic species in airborne particulate matter*. Journal of Inorganic Biochemistry, 2012. **108**.
50. Oliveira, V., J.L. Gómez-Ariza, and D. Sánchez-Rodas, *Extraction procedures for chemical speciation of arsenic in atmospheric total suspended particles*. Analytical and Bioanalytical Chemistry, 2005. **382**.
51. Slejkovec, Z., et al., *Speciation of arsenic in coarse and fine urban aerosols using sequential extraction combined with liquid chromatography and atomic fluorescence detection*. Fresenius' journal of analytical chemistry, 2000. **366**(8): p. 830-834.

52. Farinha, M.M., et al., *Arsenic speciation in lichens and in coarse and fine airborne particulate matter by HPLC–UV–HG–AFS*. Journal of atmospheric chemistry, 2004. **49**(1-3): p. 343-353.
53. Gómez-Ariza, J., et al., *A comparison between ICP-MS and AFS detection for arsenic speciation in environmental samples*. Talanta, 2000. **51**(2): p. 257-268.
54. Bluemlein, K., et al., *Can we trust mass spectrometry for determination of arsenic peptides in plants: comparison of LC-ICP-MS and LC-ES-MS/ICP-MS with XANES/EXAFS in analysis of Thunbergia alata*. Analytical and bioanalytical chemistry, 2008. **390**(7): p. 1739-1751.
55. Bednar, A., et al., *Field and laboratory arsenic speciation methods and their application to natural-water analysis*. Water research, 2004. **38**(2): p. 355-364.
56. Hwang, C.-j. and S.-J. Jiang, *Determination of arsenic compounds in water samples by liquid chromatography-inductively coupled plasma mass spectrometry with an in situ nebulizer-hydride generator*. Analytica Chimica Acta, 1994. **289**(2): p. 205-213.
57. Pääntas-Kallio, M. and P.K. Manninen, *Simultaneous determination of toxic arsenic and chromium species in water samples by ion chromatography-inductively coupled plasma mass spectrometry*. Journal of Chromatography A, 1997. **779**(1): p. 139-146.
58. Thomas, P. and K. Sniatecki, *Determination of trace amounts of arsenic species in natural waters by high-performance liquid chromatography-inductively coupled plasma mass spectrometry*. Journal of Analytical Atomic Spectrometry, 1995. **10**(9): p. 615-618.
59. Woller, Á., et al., *Simultaneous speciation of redox species of arsenic and selenium using an anion-exchange microbore column coupled with a micro-concentric nebulizer and an inductively coupled plasma mass spectrometer as detector*. Journal of Analytical Atomic Spectrometry, 1998. **13**(2): p. 141-149.
60. Thomas, P. and K. Sniatecki, *Inductively coupled plasma mass spectrometry: Application to the determination of arsenic species*. Fresenius' journal of analytical chemistry, 1995. **351**(4-5): p. 410-414.
61. Mattusch, J. and R. Wennrich, *Determination of anionic, neutral, and cationic species of arsenic by ion chromatography with ICP-MS detection in environmental samples*. Anal. Chem., 1998. **70**: p. 3649-3655.
62. Suess, E., D. Wallschläger, and B. Planer-Friedrich, *Stabilization of thioarsenates in iron-rich waters*. Chemosphere, 2011. **83**(11): p. 1524-1531.
63. Roig-Navarro, A., et al., *Simultaneous determination of arsenic species and chromium(VI) by high-performance liquid chromatography-inductively coupled plasma-mass spectrometry*. Journal of chromatography. A, 2001. **912**(2): p. 319-327.
64. Wallschläger, D. and J. London, *Determination of Methylated Arsenic-Sulfur Compounds in Groundwater*. Environmental Science & Technology, 2008. **42**.
65. Sathrugnan, K., H. Shizuko, and S.P.I. Chonattumadam, *Determination of arsenic species by microwave-assisted extraction followed by ion-pair chromatography–ICPMS: analysis of reference materials and fish tissues*. International Journal of Environmental Analytical Chemistry, 2004. **84**.
66. Milstein, L.S., et al., *Selection of a suitable mobile phase for the speciation of four arsenic compounds in drinking water samples using ion-exchange chromatography coupled to inductively coupled plasma mass spectrometry*. Environment international, 2002. **28**(4): p. 277-283.
67. Shraim, A., et al., *Speciation of arsenic in tube-well water samples collected from West Bengal, India, by high-performance liquid chromatography-inductively coupled plasma mass spectrometry*. Applied Organometallic Chemistry, 2002. **16**: p. 202-209.

68. Zheng, J., et al., *Speciation of arsenic in water, sediment, and plants of the Moira watershed, Canada, using HPLC coupled to high resolution ICP-MS*. Analytical and bioanalytical chemistry, 2003. **377**(1): p. 14-24.
69. Ronkart, S.N., et al., *Speciation of five arsenic species (arsenite, arsenate, MMAA<sup>V</sup>, DMAA<sup>V</sup> and AsBet) in different kind of water by HPLC-ICP-MS*. Chemosphere, 2007. **66**(4): p. 738-745.
70. Morita, Y., et al., *Study on simultaneous speciation of arsenic and antimony by HPLC-ICP-MS*. Talanta, 2007. **73**(1): p. 81-86.
71. Daus, B., et al., *Analytical investigations of phenyl arsenicals in groundwater*. Talanta, 2008. **75**(2): p. 376-379.
72. Kinoshita, K., et al., *Determination of diphenylarsinic acid and phenylarsonic acid, the degradation products of organoarsenic chemical warfare agents, in well water by HPLC-ICP-MS*. Appl. Organomet. Chem., 2005. **19**(2): p. 287-293.
73. Daus, B., et al., *Concentrations and speciation of arsenic in groundwater polluted by warfare agents*. Environmental Pollution, 2010. **158**(11): p. 3439-3444.
74. Maher, W.A., et al., *Thio arsenic species measurements in marine organisms and geothermal waters*. Microchemical Journal, 2013. **111**: p. 82-90.
75. Gong, Z., et al., *Speciation analysis of arsenic in groundwater from Inner Mongolia with an emphasis on acid-leachable particulate arsenic*. Analytica Chimica Acta, 2006. **555**.
76. Mester, Z. and P. Fodor, *High-performance liquid chromatography-hydride generation-atomic fluorescence spectroscopic determination of arsenic species in water*. Journal of Chromatography A, 1996. **756**(1): p. 292-299.
77. Mamindy-Pajany, Y., et al., *Arsenic in marina sediments from the Mediterranean coast: speciation in the solid phase and occurrence of thioarsenates*. Soil and Sediment Contamination: An International Journal, 2013. **22**(8): p. 984-1002.
78. Segura, M., et al., *Stability study of As(III), As(V), MMA and DMA by anion exchange chromatography and HG-AFS in wastewater samples*. Analytical and bioanalytical chemistry, 2002. **374**(3): p. 513-519.
79. Li, Y., et al., *Arsenic speciation in municipal landfill leachate*. Chemosphere, 2010. **79**(8): p. 794-801.
80. Ponthieu, M., et al., *Speciation analysis of arsenic in landfill leachate*. Water Research, 2007. **41**(14): p. 3177-3185.
81. Sanz, E., R. Muñoz-Olivas, and C. Cámara, *Evaluation of a focused sonication probe for arsenic speciation in environmental and biological samples*. Journal of chromatography. A, 2005. **1097**(1-2): p. 1-8.
82. Thomas, P., J. Finnie, and J. Williams, *Feasibility of identification and monitoring of arsenic species in soil and sediment samples by coupled high-performance liquid chromatography—inductively coupled plasma mass spectrometry*. Journal of Analytical Atomic Spectrometry, 1997. **12**(12): p. 1367-1372.
83. Hansen, S.H., et al., *Separation of seven arsenic compounds by high-performance liquid chromatography with on-line detection by hydrogen-argon flame atomic absorption spectrometry and inductively coupled plasma mass spectrometry*. Journal of Analytical Atomic Spectrometry, 1992. **7**(4): p. 629-634.
84. Demesmay, C., M. Olle, and M. Porthault, *Arsenic speciation by coupling high-performance liquid chromatography with inductively coupled plasma mass spectrometry*. Fresenius' journal of analytical chemistry, 1994. **348**(3): p. 205-210.
85. Geiszinger, A., et al., *Determination of arsenic compounds in earthworms*. Environmental Science & Technology, 1998. **32**(15): p. 2238-2243.

86. Schmidt, A.-C., et al., *Evaluation of the influence of arsenic species on the nitrogen metabolism of a model angiosperm: nasturtium, Tropaeolum majus*. Applied Organometallic Chemistry, 2005. **19**(5): p. 590-599.
87. Huang, J.-H. and G. Ilgen, *Factors affecting arsenic speciation in environmental samples: sample drying and storage*. International Journal of Environmental Analytical Chemistry, 2006. **86**.
88. Planer-Friedrich, B., et al., *Thioarsenates in Geothermal Waters of Yellowstone National Park: Determination, Preservation, and Geochemical Importance*. Environmental Science & Technology, 2007. **41**(15): p. 5245-5251.
89. Wallschläger, D. and C. Stadey, J. , *Determination of (Oxy)thioarsenates in Sulfidic Waters*. Analytical Chemistry, 2007. **79**(10): p. 3873–3880.
90. Orero Iserte, L., A.F. Roig-Navarro, and F. Hernandez, *Simultaneous determination of arsenic and selenium species in phosphoric acid extracts of sediment samples by HPLC-ICP-MS*. Anal. Chim. Acta, 2004. **527**(1): p. 97-104.
91. Yuan, C.-G., et al., *Evaluation of extraction methods for arsenic speciation in polluted soil and rotten ore by HPLC-HG-AFS analysis*. Microchimica Acta, 2007. **159**(1-2): p. 175-182.
92. Huerga, A., I. Lavilla, and C. Bendicho, *Speciation of the immediately mobilisable As(III), As(V), MMA and DMA in river sediments by high performance liquid chromatography–hydride generation–atomic fluorescence spectrometry following ultrasonic extraction*. Analytica Chimica Acta, 2005. **534**.
93. Slejkovec, Z., et al., *Speciation analysis to unravel the soil-to-plant transfer in highly arsenic-contaminated areas in Cornwall (UK)*. International Journal of Environmental Analytical Chemistry, 2010. **90**: p. 784-796.
94. Raab, A., J. Feldmann, and A. Meharg, *The nature of arsenic-phytochelatin complexes in Holcus lanatus and Pteris cretica*. Plant physiology, 2004. **134**(3): p. 1113-1122.
95. Granchinho, S.C.R., et al., *Transformation of arsenic(V) by the fungus Fusarium oxysporum melonis isolated from the alga Fucus gardneri*. Appl. Organomet. Chem., 2002. **16**: p. 721 - 726.
96. Koch, I., et al., *Arsenic species in terrestrial fungi and lichens from Yellowknife, NWT, Canada*. Appl. Organomet. Chem., 2000. **14**: p. 245–252.
97. Quaghebeur, M., Z. Rengel, and M. Smirk, *Arsenic speciation in terrestrial plant material using microwaveassisted extraction, ion chromatography and inductively coupled plasma mass spectrometry*. J. Anal. Atom. Spectrom., 2003. **18**: p. 128-134.
98. Mir, K.A., et al., *Extraction and speciation of arsenic in plants grown on arsenic contaminated soils*. Talanta, 2007. **72**(4): p. 1507-1518.
99. Schmidt, A.-C., N. Haufe, and M. Otto, *A systematic study on extraction of total arsenic from down-scaled sample sizes of plant tissues and implications for arsenic species analysis*. Talanta, 2008. **76**.
100. Raab, A., et al., *Uptake and translocation of inorganic and methylated arsenic species by plants*. Environ. Chem., 2007. **4**(3): p. 197-203.
101. Moriarty, M.M., et al., *Arsenic speciation of terrestrial invertebrates*. Environmental Science & Technology, 2009. **43**(13): p. 4818-4823.
102. Saunders, J., et al., *Arsenic transformations in terrestrial small mammal food chains from contaminated sites in Canada*. Journal of environmental monitoring : JEM, 2011. **13**(6): p. 1784-1792.
103. Bluemlein, K., A. Raab, and J. Feldmann, *Stability of arsenic peptides in plant extracts: off-line versus on-line parallel elemental and molecular mass spectrometric detection for liquid chromatographic separation*. Analytical and bioanalytical chemistry, 2009. **393**(1): p. 357-366.



104. Schmidt, A., et al., *Evaluation of extraction procedures for the ion chromatographic determination of arsenic species in plant materials*. Journal of chromatography A, 2000. **889**(1-2): p. 83-91.
105. He, B., et al., *Optimization of the extraction for the determination of arsenic species in plant materials by high-performance liquid chromatography coupled with hydride generation atomic fluorescence spectrometry*. Spectrochim. Acta B, 2002. **57**(11): p. 1705-1711.
106. Francesconi, K., et al., *Arsenic species in an arsenic hyperaccumulating fern, Pityrogramma calomelanos: a potential phytoremediator of arsenic-contaminated soils*. The Science of the total environment, 2002. **284**(1-3): p. 27-35.
107. Kohlmeier, U., et al., *Benefits of high resolution IC-ICP-MS for the routine analysis of inorganic and organic arsenic species in food products of marine and terrestrial origin*. Anal. Bioanal. Chem., 2003. **377**: p. 6-13.
108. Ackerman, A.H., et al., *Comparison of a Chemical and Enzymatic Extraction of Arsenic from Rice and an Assessment of the Arsenic Absorption from Contaminated Water by Cooked Rice*. Environmental Science & Technology, 2005. **39**: p. 5241–5246.
109. Schaeffer, R., et al., *Arsenic speciation in freshwater organisms from the river Danube in Hungary*. Talanta, 2006. **69**(4): p. 856-865.
110. Pizarro, I., et al., *Evaluation of stability of arsenic species in rice*. Analytical and bioanalytical chemistry, 2003. **376**(1): p. 102-109.
111. Hansen, H., R., et al., *Identification of tetramethylarsonium in rice grains with elevated arsenic content*. Journal of Environmental Monitoring, 2011. **13**: p. 32-34.
112. de la Calle, M.B., et al., *Does the determination of inorganic arsenic in rice depend on the method?* TrAC Trends in Analytical Chemistry, 2011. **30**.
113. Huang, J.H., et al., *Speciation of arsenite and arsenate in rice grain – Verification of nitric acid based extraction method and mass sample survey*. Food Chemistry, 2012. **130**.
114. Nam, S., et al., *Preliminary results of extraction, separation and quantitation of arsenic species in food and dietary supplements by HPLC-ICP-MS*. BULLETIN-KOREAN CHEMICAL SOCIETY, 2006. **27**(6): p. 903.
115. Maher, W., et al., *Measurement of inorganic arsenic species in rice after nitric acid extraction by HPLC-ICPMS: Verification using XANES*. Environmental Science & Technology, 2013. **47**(11): p. 5821-5827.
116. Zhu, Y.-G., et al., *High percentage inorganic arsenic content of mining impacted and nonimpacted Chinese rice*. Environmental Science & Technology, 2008. **42**(13): p. 5008-5013.
117. Williams, P., et al., *Variation in arsenic speciation and concentration in paddy rice related to dietary exposure*. Environmental Science & Technology, 2005. **39**(15): p. 5531-5540.
118. Guzmán Mar, J.L., et al., *Simultaneous extraction of arsenic and selenium species from rice products by microwave-assisted enzymatic extraction and analysis by ion chromatography-inductively coupled plasma-mass spectrometry*. J. Agric. Food Chem., 2009. **57**(8): p. 3005-3013.
119. Sun, G.-X., et al., *Inorganic arsenic in rice bran and its products are an order of magnitude higher than in bulk grain*. Environmental Science & Technology, 2008. **42**(19): p. 7542-7546.
120. Adomako, E., E., et al., *Inorganic arsenic and trace elements in Ghanaian grain staples*. Environmental Pollution, 2011. **159**(10): p. 2435–2442.
121. Meharg, A., A., et al., *Speciation and Localization of Arsenic in White and Brown Rice Grains*. Environmental Science & Technology, 2008. **42**(4): p. 1051–1057.

122. Heitkemper, D.T., et al., *Determination of total and speciated arsenic in rice by ion chromatography and inductively coupled plasma mass spectrometry*. J. Anal. Atom. Spectrom., 2001. **16**: p. 299 - 306.
123. Carbonell-Barrachina, A., et al., *Inorganic arsenic contents in rice-based infant foods from Spain, UK, China and USA*. Environmental pollution (Barking, Essex : 1987), 2012. **163**: p. 77-83.
124. Narukawa, T. and K. Chiba, *Heat-assisted aqueous extraction of rice flour for arsenic speciation analysis*. Journal of agricultural and food chemistry, 2010. **58**(14): p. 8183-8188.
125. Rattanachongkiat, S., *Arsenic in the Pak Pa-Nang River Basin, Thailand*, in *Faculty of Science and Technology* 2004, University of Plymouth: Plymouth.
126. Llorente-Mirandes, T., et al., *A need for determination of arsenic species at low levels in cereal-based food and infant cereals. Validation of a method by IC–ICPMS*. Food Chemistry, 2014. **147**: p. 377-385.
127. Coelho, N.M., et al., *Determination of arsenic compounds in beverages by high-performance liquid chromatography-inductively coupled plasma mass spectrometry*. Talanta, 2005. **66**(4): p. 818-822.
128. Wangkarn, S. and S. Pergantis, A. , *High-speed separation of arsenic compounds using narrow-bore high-performance liquid chromatography on-line with inductively coupled plasma mass spectrometry*. Journal of Analytical Atomic Spectrometry, 2000. **15**(6): p. 627-633.
129. Moreira, C.M., et al., *Arsenic speciation in white wine by LC–ICP–MS*. Food Chemistry, 2011. **126**(3): p. 1406-1411.
130. Karadjova, I., B. , et al., *Continuous flow hydride generation-atomic fluorescence spectrometric determination and speciation of arsenic in wine*. Spectrochimica Acta Part B: Atomic Spectroscopy, 2005. **60**: p. 816–823.
131. Coelho, N.M.M., et al., *High performance liquid chromatography—atomic fluorescence spectrometric determination of arsenic species in beer samples*. Analytica Chimica Acta, 2003. **482**.
132. Wolle, M.M., et al., *Speciation analysis of arsenic in prenatal and children's dietary supplements using microwave-enhanced extraction and ion chromatography–inductively coupled plasma mass spectrometry*. Analytica Chimica Acta, 2014. **818**: p. 23-31.
133. Smith, P., G. , I. Koch, and K. Reimer, J. , *Arsenic Speciation Analysis of Cultivated White Button Mushrooms ( Agaricus bisporus ) Using High-Performance Liquid Chromatography–Inductively Coupled Plasma Mass Spectrometry, and X-ray Absorption Spectroscopy*. Environmental Science & Technology, 2007. **41**: p. 6947–6954.
134. Wuilloud, R.G., S.S. Kannamkumarath, and J.A. Caruso, *Speciation of essential and toxic elements in edible mushrooms: size-exclusion chromatography separation with on-line UV–inductively coupled plasma mass spectrometry detection*. Applied Organometallic Chemistry, 2004. **18**(4): p. 156-165.
135. Ye, W.-L., et al., *Arsenic speciation in phloem and xylem exudates of castor bean*. Plant physiology, 2010. **154**(3): p. 1505-1513.
136. Smith, P., I. Koch, and K. Reimer, *Uptake, transport and transformation of arsenate in radishes (Raphanus sativus)*. The Science of the total environment, 2008. **390**(1): p. 188-197.
137. Van den Broeck, K., C. Vandecasteele, and J.M.C. Geuns, *Speciation by liquid chromatography-inductively coupled plasma-mass spectrometry of arsenic in mung bean seedlings used as a bio-indicator for the arsenic contamination*. Anal. Chim. Acta, 1998. **361**(1-2): p. 101-111.

138. Szakova, J., et al., *Comparison of mild extraction procedures for determination of arsenic compounds in different parts of pepper plants (Capsicum annum, L.)*. Applied Organometallic Chemistry, 2005. **19**(3): p. 308-314.
139. Jedynak, L., et al., *Studies on the uptake of different arsenic forms and the influence of sample pretreatment on arsenic speciation in White mustard (Sinapis alba)*. Microchemical Journal, 2010. **94**.
140. Yathavakilla, S., et al., *Arsenic speciation and identification of monomethylarsonous acid and monomethylthioarsonic acid in a complex matrix*. Analytical chemistry, 2008. **80**(3): p. 775-782.
141. Vela, N., D. Heitkemper, and K. Stewart, *Arsenic extraction and speciation in carrots using accelerated solvent extraction, liquid chromatography and plasma mass spectrometry*. The Analyst, 2001. **126**(7): p. 1011-1017.
142. Liu, X.-J., et al., *Arsenic speciation in Chinese Herbal Medicines and human health implication for inorganic arsenic*. Environmental pollution (Barking, Essex : 1987), 2013. **172**: p. 149-154.
143. Zhao, F.-J., et al., *Accumulation, distribution, and speciation of arsenic in wheat grain*. Environmental science & technology, 2010. **44**(14): p. 5464-5468.
144. D'Amato, M., et al., *Arsenic speciation in wheat and wheat products using ultrasound-and microwave-assisted extraction and anion exchange chromatography-inductively coupled plasma mass spectrometry*. Journal of Analytical Atomic Spectrometry, 2011. **26**(1): p. 207-213.
145. Sánchez-Rodas, D., J. Luis Gómez-Ariza, and V. Oliveira, *Development of a rapid extraction procedure for speciation of arsenic in chicken meat*. Anal. Bioanal. Chem., 2006. **385**(7): p. 1172-1177.
146. Pardo-Martinez, M., et al., *Comparison of enzymatic extraction procedures for use with directly coupled high performance liquid chromatography-inductively coupled plasma mass spectrometry for the speciation of arsenic in baby foods*. Anal. Chim. Acta, 2001. **441**(1): p. 29-36.
147. Langdon, C.J., et al., *Arsenic-speciation in arsenate-resistant and non-resistant populations of the earthworm, Lumbricus rubellus*. Journal of Environmental Monitoring, 2002. **4**(4): p. 603-608.
148. Geiszinger, A., W. Goessler, and W. Kosmus, *An arsenosugar as the major extractable arsenical in the earthworm Lumbricus terrestris*. Appl. Organomet. Chem., 2002. **16**: p. 473 - 476.
149. Button, M., et al., *Arsenic speciation in field-collected and laboratory-exposed earthworms Lumbricus terrestris*. Chemosphere, 2011. **85**: p. 1277-1283.
150. Caumette, G., et al., *Arsenic Speciation in Plankton Organisms from Contaminated Lakes: Transformations at the Base of the Freshwater Food Chain*. Environmental Science & Technology, 2011. **45**.
151. Caumette, G., et al., *Arsenic cycling in freshwater phytoplankton and zooplankton cultures*. Environmental Chemistry, 2014. **11**(5): p. 496-505.
152. Ciardullo, S., et al., *Arsenic speciation in freshwater fish: focus on extraction and mass balance*. Talanta, 2010. **81**(1-2): p. 213-221.
153. Schaeffer, R., et al., *Determination of arsenic species in seafood samples from the Aegean Sea by liquid chromatography-(photo-oxidation)-hydride generation-atomic fluorescence spectrometry*. Anal. Chim. Acta, 2005. **547**(1): p. 109-118.
154. Fauser, P., et al., *Occurrence and sorption properties of arsenicals in marine sediments*. Environmental monitoring and assessment, 2013. **185**(6): p. 4679-4691.

155. Nakazato, T., et al., *Determination of arsenite, arsenate, and monomethylarsonic acid in seawater by ion-exclusion chromatography combined with inductively coupled plasma mass spectrometry using reaction cell and hydride generation techniques*. Talanta, 2002. **58**(1): p. 121-132.
156. Ellwood, M.J. and W.A. Maher, *Arsenic and antimony species in surface transects and depth profiles across a frontal zone: The Chatham Rise, New Zealand*. Deep-Sea Res. I, 2002. **49**: p. 1971 - 1981.
157. Rattanachongkiat, S., G. Millward, and M. Foulkes, *Determination of arsenic species in fish, crustacean and sediment samples from Thailand using high performance liquid chromatography (HPLC) coupled with inductively coupled plasma mass spectrometry (ICP-MS)*. Journal of environmental monitoring : JEM, 2004. **6**(4): p. 254-261.
158. Kirby, J., et al., *Arsenic concentrations and speciation in a temperate mangrove ecosystem, NSW, Australia*. Applied Organometallic Chemistry, 2002. **16**.
159. Maher, W.A., et al., *Arsenic distribution and species in two Zostera capricorni seagrass ecosystems, New South Wales, Australia*. Environmental Chemistry, 2011. **8**(1): p. 9-18.
160. Price, A., et al., *Distribution of arsenic species in an open seagrass ecosystem: relationship to trophic groups, habitats and feeding zones*. Environmental Chemistry, 2012. **9**(1): p. 77-88.
161. Foster, S., D. Thomson, and W. Maher, *Uptake and metabolism of arsenate by axenic cultures of the microalgae Dunaliella tertiolecta and Phaeodactylum tricornutum*. Marine Chemistry, 2008. **108**(3-4): p. 172-183.
162. Duncan, E., S. Foster, and W. Maher, *Uptake and metabolism of arsenate, methylarsonate and arsenobetaine by axenic cultures of the phytoplankton Dunaliella tertiolecta*. Botanica Marina, 2010. **53**(4): p. 377-386.
163. Duncan, E.G., et al., *Influence of culture regime on arsenic cycling by the marine phytoplankton Dunaliella tertiolecta and Thalassiosira pseudonana*. Environmental Chemistry, 2013: p. -.
164. Duncan, E.G., et al., *The influence of bacteria on the arsenic species produced by laboratory cultures of the marine phytoplankton Dunaliella tertiolecta*. Journal of Applied Phycology, 2014. **18 February 2014**: p. 1-6.
165. Foster, S., et al., *Distribution and Speciation of Arsenic in Temperate Marine Saltmarsh Ecosystems*. Environmental Chemistry, 2005. **2**.
166. Foster, S., et al., *A microwave assisted technique for the sequential extraction of water and non-water soluble arsenic compounds from estuarine plant and marine animal tissue using dilute nitric acid*. Talanta, 2007. **71**(2): p. 537-549.
167. Thomson, D., W. Maher, and S. Foster, *Arsenic and selected elements in marine angiosperms, south-east coast, NSW, Australia*. Applied Organometallic Chemistry, 2007. **21**(6): p. 381-395.
168. Foster, S., *Arsenic cycling in marine ecosystems: Investigating the link between primary production and secondary consumption*, in *Institute of Applied Ecology* 2008, University of Canberra: Canberra. p. 228.
169. Pell, A., et al., *LC-ICP-MS analysis of arsenic compounds in dominant seaweeds from the Thermaikos Gulf (Northern Aegean Sea, Greece)*. Chemosphere, 2013. **93**(9): p. 2187-2194.
170. Edmonds, J., et al., *Arsenic lipids in the digestive gland of the western rock lobster Panulirus cygnus: an investigation by HPLC ICP-MS*. The Science of the total environment, 1992. **122**(3): p. 321-335.
171. Morita, M. and Y. Shibata, *Chemical form of arsenic in marine macroalgae*. Applied Organometallic Chemistry, 1990. **4**: p. 181-190.

172. Meier, J., et al., *The occurrence of thio-arsenosugars in some samples of marine algae*. Environ. Chem., 2005. **2**(4): p. 304-307.
173. Terol, A., et al., *High temperature liquid chromatography-inductively coupled plasma mass spectrometry for the determination of arsenosugars in biological samples*. Journal of chromatography. A, 2012. **1262**: p. 70-76.
174. Raber, G., et al., *Determination of 'arsenosugars' in algae with anion-exchange chromatography and an inductively coupled plasma mass spectrometer as element-specific detector*. Fresenius' journal of analytical chemistry, 2000. **367**(2): p. 181-188.
175. Todolí, J.L. and M. Grotti, *Fast determination of arsenosugars in algal extracts by narrow bore high-performance liquid chromatography-inductively coupled plasma mass spectrometry*. Journal of Chromatography A, 2010. **1217**(47): p. 7428-7433.
176. Yang, G.A.O., et al., *Determination of Arsenic and It's Species in Dry Seafood by High Performance Liquid Chromatography-Inductively Coupled Plasma Mass Spectrometry*. Chinese Journal of Analytical Chemistry, 2009. **37**.
177. Foster, S., et al., *Arsenic species in a rocky intertidal marine food chain in NSW, Australia, revisited*. Environmental Chemistry, 2006. **3**(4): p. 304-315.
178. Foster, S., W. Maher, and F. Krikowa, *Changes in proportions of arsenic species within an Ecklonia radiata food chain*. Environmental Chemistry, 2008. **5**(3): p. 176-183.
179. Thomson, D., W. Maher, and S. Foster, *Arsenic and selected elements in inter-tidal and estuarine marine algae, south-east coast, NSW, Australia*. Applied Organometallic Chemistry, 2007. **21**(6): p. 396-411.
180. Tukai, R., et al., *Measurement of arsenic species in marine macroalgae by microwave-assisted extraction and high performance liquid chromatography-inductively coupled plasma mass spectrometry*. Anal. Chim. Acta, 2002. **457**(2): p. 173-185.
181. Tukai, R., et al., *Occurrence and chemical form of arsenic in marine macroalgae from the east coast of Australia*. Mar. Freshwater Res., 2002. **53**(6): p. 971-980.
182. Kirby, J. and W. Maher, *Measurement of water-soluble arsenic species in freeze-dried marine animal tissues by microwave-assisted extraction and HPLC-ICP-MS*. Journal of Analytical Atomic Spectrometry, 2002. **17**.
183. Kirby, J. and W. Maher, *Tissue accumulation and distribution of arsenic compounds in three marine fish species: relationship to trophic position*. Applied Organometallic Chemistry, 2002. **16**.
184. Foster, S. and W. Maher, *Degradation of arsenoribosides from marine macroalgae in simulated rock pools*. Arsenic in Geosphere and Human Diseases, 2010: p. 230-232.
185. Duncan, E.G., et al., *Arsenoriboside degradation in marine systems: The use of bacteria culture incubation experiments as model systems*. Chemosphere, 2014. **95**: p. 635-638.
186. Duncan, E., et al., *The degradation of arsenoribosides from Ecklonia radiata tissues decomposed in natural and microbially-manipulated microcosms*. Environmental Chemistry, 2014.
187. Duncan, E.G., et al., *Total arsenic concentrations and arsenic species present in naturally decomposing Ecklonia radiata tissues collected from various marine habitats*. Journal of Applied Phycology, 2014: p. 1-9.
188. Zhang, C.H., Y. Wang, and Y. Ge, *Determination of Five Arsenic Species in Porphyra by Microwave-Assisted Water Extraction and High Performance Liquid Chromatography-Atomic Fluorescence Spectrometry*. Analytical Letters, 2013. **46**.

189. Contreras-Acuña, M., et al., *Speciation of arsenic in marine food (Anemonia sulcata) by liquid chromatography coupled to inductively coupled plasma mass spectrometry and organic mass spectrometry*. Journal of chromatography. A, 2013. **1282**: p. 133-141.
190. Kahn, M., et al., *Two novel thio-arsenosugars in scallops identified with HPLC-ICPMS and HPLC-ESMS*. Environ. Chem., 2005. **2**: p. 171.
191. Schmeisser, E., et al., *Thio arsenosugars identified as natural constituents of mussels by liquid chromatography-mass spectrometry*. Chemical communications 2004. **16**: p. 1824-1825.
192. Ruttens, A., et al., *Arsenic speciation in food in Belgium*. Journal of Geochemical Exploration, 2012. **121**.
193. Dahl, L., et al., *Stability of arsenic compounds in seafood samples during processing and storage by freezing*. Food Chemistry, 2010. **123**(3): p. 720-727.
194. Conklin, S., D. , P. Creed, A. , and J. Creed, T. , *Detection and quantification of a thio-arsenosugar in marine molluscs by IC-ICP-MS with an emphasis on the interaction of arsenosugars with sulfide as a function of pH*. Journal of Analytical Atomic Spectrometry, 2006. **21**: p. 869-875.
195. Fricke, M.W., et al., *Extraction and detection of a new sulfide containing arsenosugar in molluscs by IC-ICP-MS and IC-ESI-MS/MS*. J. Anal. Atom. Spectrom., 2004. **19**: p. 1454-1459.
196. Kirby, J., W. Maher, and D. Spooner, *Arsenic occurrence and species in near-shore macroalgae-feeding marine animals*. Environmental science & technology, 2005. **39**(16): p. 5999-6005.
197. Fernández-Costas, C., I. Lavilla, and C. Bendicho, *Ultrasonic Extraction–Ozonation Sequential Sample Treatment for the Determination of Arsenic in Environmental Certified Reference Materials by Hydride Generation–Atomic Fluorescence Spectrometry*. Spectroscopy Letters, 2006. **39**(6): p. 713-725.
198. Simon, S., et al., *Speciation analysis of organoarsenical compounds in biological matrices by coupling ion chromatography to atomic fluorescence spectrometry with on-line photooxidation and hydride generation*. Analytica Chimica Acta, 2004. **521**(1): p. 99-108.
199. Sánchez-Rodas, D., et al., *Determination of an arsenosugar in oyster extracts by liquid chromatography-electrospray mass spectrometry and liquid chromatography-ultraviolet photo-oxidation-hydride generation atomic fluorescence spectrometry*. The Analyst, 2002. **127**.
200. Brisbin, J., C. B'Hymer, and J. Caruso, *A gradient anion exchange chromatographic method for the speciation of arsenic in lobster tissue extracts*. Talanta, 2002. **58**(1): p. 133-145.
201. Branch, S., et al., *Determination of arsenic in samples with high chloride content by inductively coupled plasma mass spectrometry*. J. Anal. Atom. Spectrom., 1991. **6**: p. 151-154.
202. Beauchemin, D., et al., *Determination of arsenic species by high-performance liquid chromatography-inductively coupled plasma mass spectrometry*. Journal of Analytical Atomic Spectrometry, 1989. **4**(3): p. 285-289.
203. Rodriguez, I., B. , G. Raber, and W. Goessler, *Arsenic speciation in fish sauce samples determined by HPLC coupled to inductively coupled plasma mass spectrometry*. Food Chemistry, 2009. **112**(4): p. 1084–1087.
204. Geiszinger, A.E., W. Goessler, and K.A. Francesconi, *The marine polychaete Arenicola marina: its unusual arsenic compound pattern and its uptake of arsenate from seawater*. Mar. Environ. Res., 2002. **53**(1): p. 37-50.
205. Waring, J., et al., *Occurrence and speciation of arsenic in common Australian coastal polychaete species*. Environmental Chemistry, 2005. **2**(2): p. 108-118.

206. Fujihara, J., et al., *Arsenic accumulation in livers of pinnipeds, seabirds and sea turtles: subcellular distribution and interaction between arsenobetaine and glycine betaine*. Comparative biochemistry and physiology. Toxicology & pharmacology : CBP, 2003. **136**(4): p. 287-296.
